# Supplementary material for: Investigation of sources of gravity waves observed in the Brazilian equatorial region on 8 April 2005
Source: Copernicus journal article supplement (doi:10.5194/angeo-38-507-2020), 2020-04-16
Supplement: Supplementary file 1 [file angeo-38-507-2020-supplement.zip]

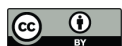

## *Supplement of*

# **Investigation of sources of gravity waves observed in the Brazilian equatorial region on 8 April 2005**

**Oluwakemi Dare-Idowu et al.**

*Correspondence to:* Oluwakemi Dare-Idowu ([oluwakemidareidowu@gmail.com](mailto:oluwakemidareidowu@gmail.com))

- [angeo-38-507-2020-supplement-title-page.pdf](#)
- [Dare-Idowu-1.mp4](#)

The copyright of individual parts of the supplement might differ from the CC BY 4.0 License.
