# Supplementary material for: Investigation of sources of gravity waves observed in the Brazilian equatorial region on 8 April 2005
Source: Copernicus journal article supplement (doi:10.5194/angeo-38-507-2020), 2020-04-16
Supplement: Supplementary file 2 [file angeo-38-507-2020-supplement.zip]

Archive with 2 entries (2 files):
- angeo-38-507-2020-supplement-title-page.pdf
- Dare-Idowu-1.mp4
